# Supplementary material for: Local de-condensation of double-stranded DNA in oppositely charged polyelectrolyte as induced by spermidine
Source: Royal Society of Chemistry journal article supplement (doi:10.1039/c5sm00552c), 2015-01-01
Supplement: c5sm00552c1.pdf [file c5sm00552c1.pdf]

Supporting information for:

Local De-Condensation of Double-stranded DNA in Oppositely Charged  
Polyelectrolyte as Induced by Spermidine

Wei Pan, Jihan Zhou, Yudan Yin, Hao Wen, and Dehai Liang\*

Beijing National Laboratory for Molecular Sciences, Key Laboratory of Polymer  
Chemistry & Physics of Ministry of Education, College of Chemistry & Molecular  
Engineering, Peking University, Beijing 100871, P.R. China

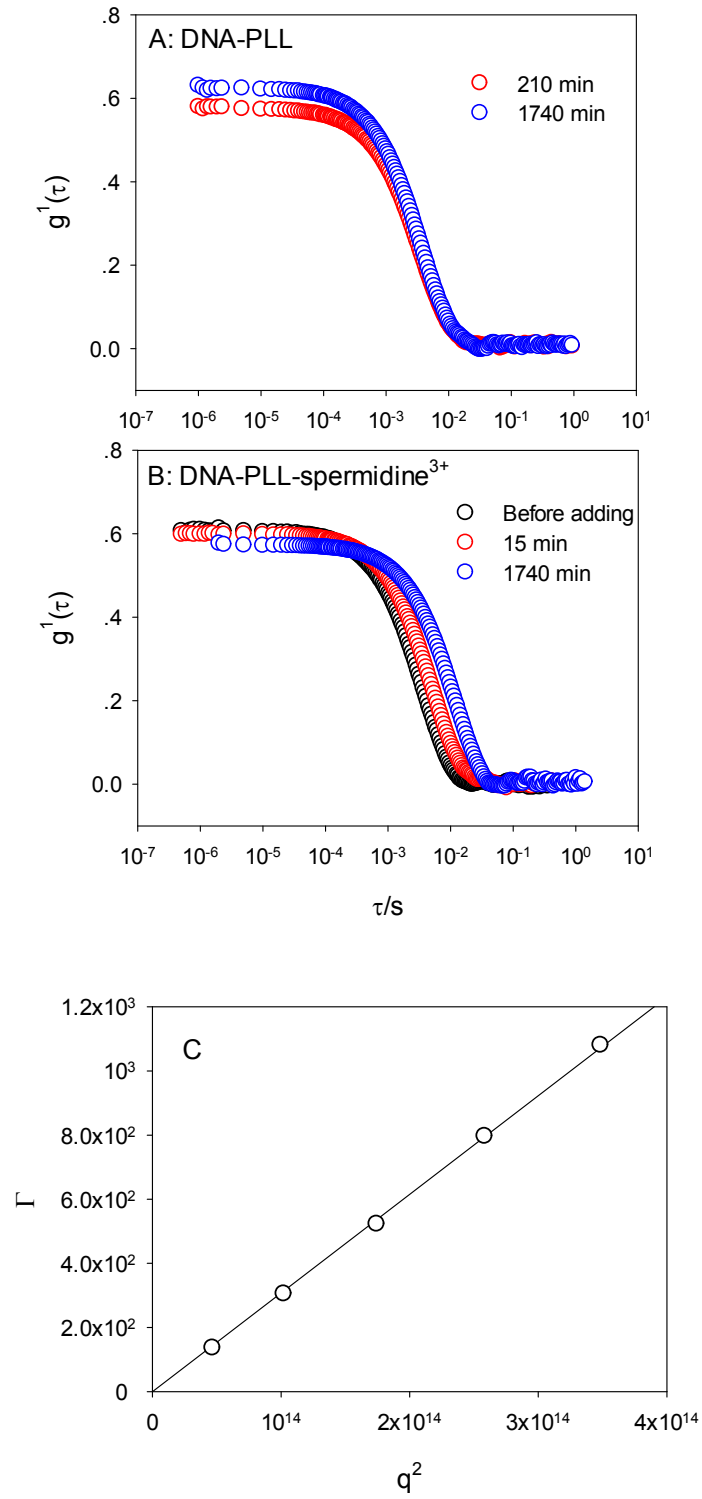

Figure S1: Normalized photon correlation curves. (A) DNA-PLL complex at  $\pm = 0.5$  at 210 min and 1740 min. (B) DNA-PLL complex at  $\pm = 0.5$  before adding spermidine, 15

min and 1740 min after adding spermidine (370  $\mu\text{M}$ ). Panel C shows one of the  $\Gamma$  versus  $q^2$  curves. It is linear and passes through origin, indicating that the mode is diffusive.

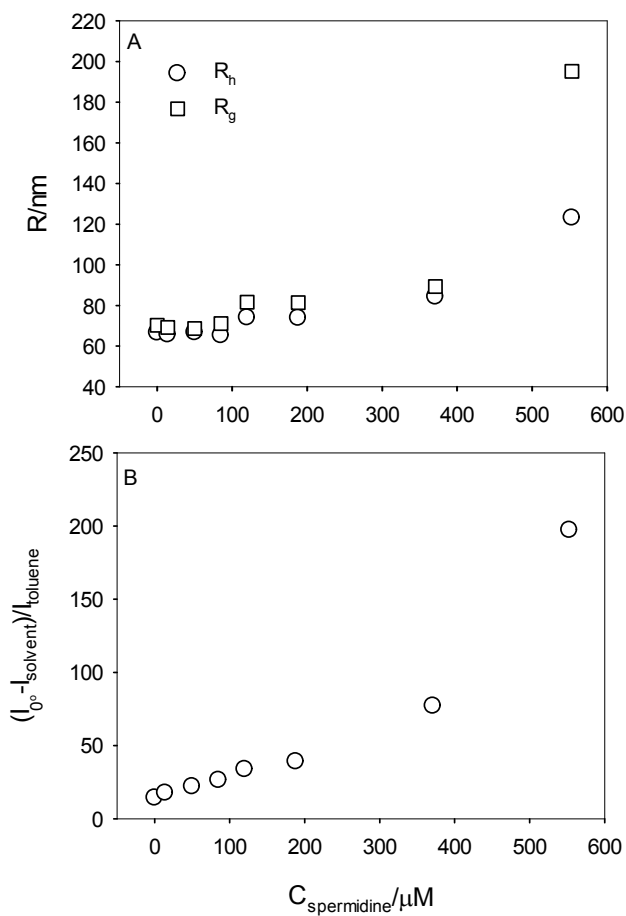

Figure S2. LLS results on the complex of DNA/PLL after being added with spermidine. (A) the hydrodynamic radius and radius of gyration, and (B) the excess scattered intensity of the complex at different spermidine concentrations. The initial +/- ratio of the complex is 0.5. The concentrations of DNA and PLL solution are  $1.0 \times 10^{-5}$  g/mL and  $1.0 \times 10^{-4}$  g/mL, respectively.

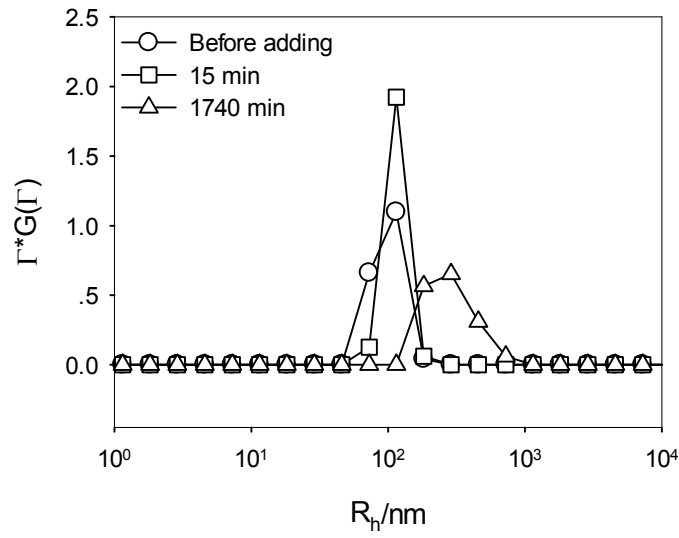

Figure S3. Size distribution of the complex formed by DNA and PLL (+/- = 0.5) before and after the addition of spermidine (370  $\mu$ M).

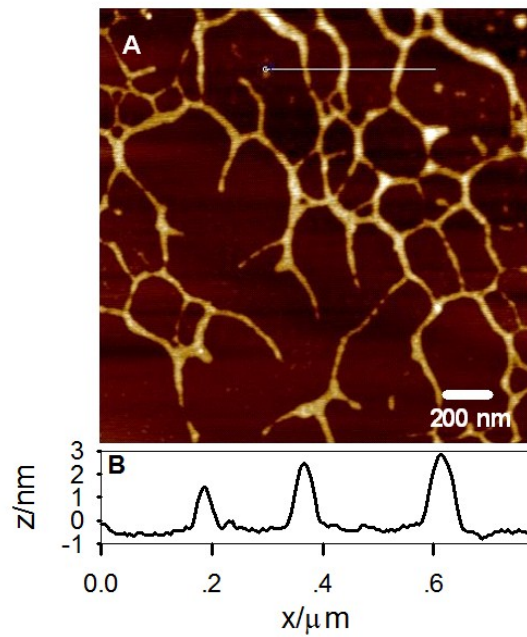

Figure S4: Morphology of DNA-spermidine<sup>3+</sup> in 1 x TE buffer (A). Panel B shows the corresponding height profile as indicated by the line in A. The concentrations of DNA and spermidine solution are  $1.0 \times 10^{-5}$  g/mL and 370  $\mu$ M, respectively. The broad width is probably caused by aggregation.

Table R1. Zeta potential results of the DNA/PLL complex before and after adding spermidine

| <b>DNA-PLL</b>                         | <b>Zeta potential/mV</b> |
|----------------------------------------|--------------------------|
| 5 min                                  | $-25 \pm 5$              |
| 24 h                                   | $-24 \pm 2$              |
| <b>DNA-PLL-spermidine<sup>3+</sup></b> | <b>Zeta potential/mV</b> |
| 5 min                                  | $-18 \pm 1$              |
| 24 h                                   | $-18 \pm 1$              |
